# Supplementary material for: Diurnally Entrained Anticipatory Behavior in Archaea
Source: PLOS journal article supplement (doi:10.1371/journal.pone.0005485), 2009-05-07
Supplement: S4 (10.1371/journal.pone.0005485.s004) [file journal.pone.0005485.s004]

**Table S3.** The number of genes and average period in each of the clusters presented in Figure 3 of the Experiment A.main text. The number of genes correlated to high or low oxygen (taken from Schmid et al. 2007) are also given.

| Cluster | Color* | Avg. period | # genes | + O <sub>2</sub> correlation | - O <sub>2</sub> correlation |
|---------|--------|-------------|---------|------------------------------|------------------------------|
| 1       | orange | 13.2        | 70      | 0                            | 33 (47%)                     |
| 2       | red    | 21.1        | 65      | 0                            | 17 (26%)                     |
| 3       | blue   | 18.5        | 45      | 20 (44%)                     | 0                            |
